# Supplementary material for: Coordination Polymers Based on Rhenium Octahedral Chalcocyanide Cluster Anions and Ag+ Cations with Bipyridine Analogs
Source: MDPI journal article supplement (doi:10.3390/molecules27227684), 2022-11-09
Supplement: s1 [file s1]

## Electronic supplementary information

### Coordination polymers based on rhenium octahedral chalcocyanide cluster and Ag<sup>+</sup> cations with bipyridine derivatives

Yulia M. Litvinova,<sup>a</sup> Yakov M. Gayfulin,<sup>a</sup> Taisiya S. Sukhikh Konstantin A. Brylev<sup>a</sup> and Yuri V. Mironov<sup>a\*</sup>

<sup>a</sup>Nikolaev Institute of Inorganic Chemistry SB RAS, 630090, 3, Acad. Lavrentiev ave., Novosibirsk, Russia.

#### Table of contents:

- **Table S1.** Crystal data and structure refinement for **1-6**: pp. 2S-2S;
- **Table S2.** Selected interatomic distances of compounds **1-6**: p. 4S;
- **Tables S3-S8.** Selected bond distances (Å) and angles (°) for **1-6**: pp. 5S-12S;

**Table S1.** Crystal data and structure refinement for 1-6.

| Identification code                | 1                                                                                               | 2                                                                                              | 3                                                                                               | 4                                                                                               | 5                                                                                                              | 6                                                                                                                         |
|------------------------------------|-------------------------------------------------------------------------------------------------|------------------------------------------------------------------------------------------------|-------------------------------------------------------------------------------------------------|-------------------------------------------------------------------------------------------------|----------------------------------------------------------------------------------------------------------------|---------------------------------------------------------------------------------------------------------------------------|
| Empirical formula                  | C <sub>54</sub> H <sub>32</sub> Ag <sub>4</sub> N <sub>14</sub> Re <sub>6</sub> Se <sub>8</sub> | C <sub>54</sub> H <sub>32</sub> Ag <sub>4</sub> N <sub>14</sub> Re <sub>6</sub> S <sub>8</sub> | C <sub>22</sub> H <sub>12</sub> Ag <sub>4</sub> N <sub>14</sub> Re <sub>6</sub> Se <sub>8</sub> | C <sub>28</sub> H <sub>19</sub> Ag <sub>4</sub> N <sub>11</sub> Re <sub>6</sub> Se <sub>8</sub> | C <sub>98</sub> H <sub>74</sub> Ag <sub>4</sub> N <sub>16</sub> O <sub>2</sub> Re <sub>6</sub> Se <sub>8</sub> | C <sub>97.89</sub> H <sub>73.96</sub> Ag <sub>4</sub> N <sub>15.94</sub> O <sub>2.06</sub> Re <sub>6</sub> S <sub>8</sub> |
| Formula weight                     | 3057.29                                                                                         | 2682.09                                                                                        | 2652.82                                                                                         | 2689.90                                                                                         | 3688.06                                                                                                        | 3311.60                                                                                                                   |
| Temperature/K                      | 150(2)                                                                                          | 150(2)                                                                                         | 150(2)                                                                                          | 150(2)                                                                                          | 150(2)                                                                                                         | 150(2)                                                                                                                    |
| Crystal system                     | triclinic                                                                                       | triclinic                                                                                      | orthorhombic                                                                                    | monoclinic                                                                                      | monoclinic                                                                                                     | monoclinic                                                                                                                |
| Space group                        | P-1                                                                                             | P-1                                                                                            | Pbca                                                                                            | C2/m                                                                                            | P2 <sub>1</sub> /c                                                                                             | P2 <sub>1</sub> /c                                                                                                        |
| a/Å                                | 10.5725(7)                                                                                      | 10.7136(3)                                                                                     | 14.5198(3)                                                                                      | 15.6758(3)                                                                                      | 20.0889(5)                                                                                                     | 20.0626(7)                                                                                                                |
| b/Å                                | 11.2072(8)                                                                                      | 11.0306(3)                                                                                     | 15.5943(3)                                                                                      | 11.5882(2)                                                                                      | 12.4770(3)                                                                                                     | 12.4266(3)                                                                                                                |
| c/Å                                | 13.7913(9)                                                                                      | 13.5130(4)                                                                                     | 17.9669(3)                                                                                      | 13.1195(3)                                                                                      | 20.3997(5)                                                                                                     | 20.2079(6)                                                                                                                |
| α/°                                | 106.617(2)                                                                                      | 105.7760(10)                                                                                   | 90                                                                                              | 90                                                                                              | 90                                                                                                             | 90                                                                                                                        |
| β/°                                | 95.128(2)                                                                                       | 94.8770(10)                                                                                    | 90                                                                                              | 112.0250(10)                                                                                    | 99.653(2)                                                                                                      | 100.7180(10)                                                                                                              |
| γ/°                                | 106.227(2)                                                                                      | 106.6780(10)                                                                                   | 90                                                                                              | 90                                                                                              | 90                                                                                                             | 90                                                                                                                        |
| Volume/Å <sup>3</sup>              | 1477.81(17)                                                                                     | 1448.92(7)                                                                                     | 4068.18(13)                                                                                     | 2209.29(8)                                                                                      | 5040.8(2)                                                                                                      | 4950.1(3)                                                                                                                 |
| Z                                  | 1                                                                                               | 1                                                                                              | 4                                                                                               | 2                                                                                               | 2                                                                                                              | 2                                                                                                                         |
| ρ <sub>calc</sub> /cm <sup>3</sup> | 3.435                                                                                           | 3.074                                                                                          | 4.331                                                                                           | 4.044                                                                                           | 2.427                                                                                                          | 2.219                                                                                                                     |
| μ/mm <sup>-1</sup>                 | 18.503                                                                                          | 14.135                                                                                         | 26.848                                                                                          | 24.720                                                                                          | 10.874                                                                                                         | 8.301                                                                                                                     |
| F(000)                             | 1364.0                                                                                          | 1220.0                                                                                         | 4608.0                                                                                          | 2348.0                                                                                          | 3392.0                                                                                                         | 3102.0                                                                                                                    |
| Crystal                            | 0.12 × 0.09 ×                                                                                   | 0.08 × 0.03 ×                                                                                  | 0.08 × 0.04 ×                                                                                   | 0.1 × 0.025 ×                                                                                   | 0.23 × 0.2 ×                                                                                                   | 0.2 × 0.06 ×                                                                                                              |

|                                                  |                                                                        |                                                                        |                                                                        |                                                                        |                                                                        |                                                                    |
|--------------------------------------------------|------------------------------------------------------------------------|------------------------------------------------------------------------|------------------------------------------------------------------------|------------------------------------------------------------------------|------------------------------------------------------------------------|--------------------------------------------------------------------|
| size/mm <sup>3</sup>                             | 0.06                                                                   | 0.03                                                                   | 0.04                                                                   | 0.025                                                                  | 0.2                                                                    | 0.01                                                               |
| Radiation                                        | MoK $\alpha$ ( $\lambda$ = 0.71073)                                    | MoK $\alpha$ ( $\lambda$ = 0.71073)                                |
| 2 $\Theta$ range for data collection/ $^{\circ}$ | 4.206 to 63.07                                                         | 4.032 to 61.096                                                        | 4.454 to 63.012                                                        | 4.496 to 61.016                                                        | 4.05 to 57.178                                                         | 3.874 to 61.016                                                    |
| Index ranges                                     | -15 $\leq$ h $\leq$ 15, -16 $\leq$ k $\leq$ 16, -20 $\leq$ l $\leq$ 20 | -15 $\leq$ h $\leq$ 15, -15 $\leq$ k $\leq$ 14, -19 $\leq$ l $\leq$ 19 | -21 $\leq$ h $\leq$ 15, -22 $\leq$ k $\leq$ 22, -26 $\leq$ l $\leq$ 21 | -22 $\leq$ h $\leq$ 21, -16 $\leq$ k $\leq$ 16, -18 $\leq$ l $\leq$ 18 | -26 $\leq$ h $\leq$ 23, -16 $\leq$ k $\leq$ 15, -27 $\leq$ l $\leq$ 14 | -28 $\leq$ h $\leq$ 28, 0 $\leq$ k $\leq$ 17, 0 $\leq$ l $\leq$ 28 |
| Reflections collected                            | 30938                                                                  | 27140                                                                  | 25418                                                                  | 13500                                                                  | 23623                                                                  | 15086                                                              |
| Independent reflections                          | 9861 [R <sub>int</sub> = 0.0498, R <sub>sigma</sub> = 0.0503]          | 8886 [R <sub>int</sub> = 0.0405, R <sub>sigma</sub> = 0.0440]          | 6725 [R <sub>int</sub> = 0.0430, R <sub>sigma</sub> = 0.0400]          | 3524 [R <sub>int</sub> = 0.0305, R <sub>sigma</sub> = 0.0286]          | 11102 [R <sub>int</sub> = 0.0241, R <sub>sigma</sub> = 0.0345]         | 15086 [R <sub>int</sub> = 0.0402, R <sub>sigma</sub> = 0.0400]     |
| Data/restraints /parameters                      | 9861/0/388                                                             | 8886/9/388                                                             | 6725/6/254                                                             | 3524/27/158                                                            | 11102/0/599                                                            | 15086/0/592                                                        |
| Goodness-of-fit on F <sup>2</sup>                | 1.057                                                                  | 1.034                                                                  | 1.032                                                                  | 1.018                                                                  | 1.051                                                                  | 1.195                                                              |
| Final R indexes [I $\geq$ 2 $\sigma$ (I)]        | R <sub>1</sub> = 0.0279, wR <sub>2</sub> = 0.0646                      | R <sub>1</sub> = 0.0295, wR <sub>2</sub> = 0.0531                      | R <sub>1</sub> = 0.0289, wR <sub>2</sub> = 0.0514                      | R <sub>1</sub> = 0.0213, wR <sub>2</sub> = 0.0417                      | R <sub>1</sub> = 0.0283, wR <sub>2</sub> = 0.0674                      | R <sub>1</sub> = 0.0449, wR <sub>2</sub> = 0.1091                  |
| Final R indexes [all data]                       | R <sub>1</sub> = 0.0334, wR <sub>2</sub> = 0.0666                      | R <sub>1</sub> = 0.0374, wR <sub>2</sub> = 0.0564                      | R <sub>1</sub> = 0.0402, wR <sub>2</sub> = 0.0550                      | R <sub>1</sub> = 0.0283, wR <sub>2</sub> = 0.0437                      | R <sub>1</sub> = 0.0366, wR <sub>2</sub> = 0.0703                      | R <sub>1</sub> = 0.0540, wR <sub>2</sub> = 0.1121                  |
| Largest diff. peak/hole / e $\text{\AA}^{-3}$    | 1.96/-2.44                                                             | 1.58/-1.20                                                             | 1.65/-1.57                                                             | 1.25/-2.36                                                             | 2.14/-1.66                                                             | 3.08/-2.01                                                         |

**Table S2.** Selected bond distances (Å)

|                | 1                                     | 2                                       | 3                                   | 4                                    | 5                                     | 6                                    |
|----------------|---------------------------------------|-----------------------------------------|-------------------------------------|--------------------------------------|---------------------------------------|--------------------------------------|
| Re–Re          | 2.6315(2)–<br>2.6405(2) /<br>2.635(3) | 2.6014(3)–<br>2.6047(3) /<br>2.603(1)   | 2.4783(3)–<br>2.7365(3) /<br>2.6(1) | 2.6176(3)–<br>2.6426(3) /<br>2.62(8) | 2.6223(3)–<br>2.6476(3) /<br>2.629(6) | 2.591(4)–<br>2.6162(4) /<br>2.603(5) |
| Re–Se/Re–<br>S | 2.5055(4)–<br>2.5294(4) /<br>2.521(7) | 2.3922(13)–<br>2.4121(13)<br>/ 2.406(5) | 2.346(5)–<br>2.6384(6) /<br>2.5(1)  | 2.511(4)–<br>2.5783(6) /<br>2.52(2)  | 2.5154(5)–<br>2.5328(5) /<br>2.521(5) | 2.399(2)–<br>2.420(2) /<br>2.408(6)  |
| Re–C           | 2.097(4)–<br>2.112(4) /<br>2.105(6)   | 2.107(6)–<br>2.143(6) /<br>2.12(1)      | 2.041(5)–<br>2.157(6) /<br>2.5(1)   | 2.094(4)–<br>2.100(6) /<br>2.097(3)  | 2.088(5)–<br>2.107(5) /<br>2.096(8)   | 2.099(8)–<br>2.118(8) /<br>2.11(8)   |
| Ag–N           | 2.139(3)–<br>2.673(5) /<br>2.3(1)     | 2.133(5)–<br>2.505(5) /<br>2.3(1)       | 1.994(5)–<br>2.583(5) /<br>2.1(2)   | 2.140(3)–<br>2.473(5) /<br>2.2(1)    | 2.176(4)–<br>2.63(4) /<br>2.3(2)      | 2.164(7)–<br>2.622(8) /<br>2.3(2)    |

**Table S3.** Selected bond distances (Å) and angles (°) for **1**

| 1             |            |
|---------------|------------|
| Ag1–Ag1       | 3.2532(7)  |
| Ag1–N1        | 2.258(4)   |
| Ag1–N101      | 2.316(3)   |
| Ag1–N102      | 2.444(4)   |
| Ag2–N3        | 2.139(3)   |
| Ag2–N201      | 2.319(4)   |
| Ag2–N2        | 2.374(4)   |
| Ag2–N202      | 2.394(4)   |
| N1–Ag1–N101   | 169.17(13) |
| N101–Ag1–Ag1  | 136.17(9)  |
| N102–Ag1–Ag1  | 152.53(9)  |
| N101–Ag1–N102 | 70.35(12)  |
| N1–Ag1–N102   | 98.84(12)  |
| N1–Ag1–Ag1    | 54.46(9)   |
| N2–Ag2–N202   | 103.16(12) |
| N201–Ag2–N2   | 94.88(13)  |
| N3–Ag2–N2     | 107.04(14) |
| N201–Ag2–N202 | 71.42(12)  |
| N3–Ag2–N201   | 149.61(13) |
| N3–Ag2–N202   | 121.51(14) |
| C1–N1–Ag1     | 135.9(3)   |
| C101–N101–Ag1 | 124.8(3)   |
| C112–N101–Ag1 | 117.1(3)   |
| C110–N102–Ag1 | 126.7(3)   |
| C111–N102–Ag1 | 112.8(3)   |
| C2–N2–Ag2     | 162.2(3)   |
| C201–N201–Ag2 | 124.6(3)   |
| C212–N201–Ag2 | 116.0(3)   |
| C210–N202–Ag2 | 126.5(3)   |

|               |          |
|---------------|----------|
| C211–N202–Ag2 | 114.4(3) |
| C3–N3–Ag2     | 156.1(3) |

**Table S4.** Selected bond distances (Å) and angles (°) for **2**

| 2             |            |
|---------------|------------|
| Ag1–Ag1       | 3.3081(8)  |
| Ag1–N1        | 2.341(5)   |
| Ag1–N101      | 2.400(5)   |
| Ag1–N102      | 2.333(5)   |
| Ag2–N3        | 2.407(5)   |
| Ag2–N201      | 2.311(5)   |
| Ag2–N2        | 2.133(5)   |
| Ag2–N202      | 2.390(5)   |
| N1–Ag1–N101   | 100.29(15) |
| N101–Ag1–Ag1  | 147.85(11) |
| N102–Ag1–Ag1  | 137.57(11) |
| N102–Ag1–N101 | 70.94(15)  |
| N102–Ag1–N1   | 168.52(16) |
| N1–Ag1–Ag1    | 44.98(10)  |
| N2–Ag2–N202   | 122.09(16) |
| N2–Ag2–N201   | 149.79(17) |
| N2–Ag2–N3     | 106.10(17) |
| N201–Ag2–N202 | 72.03(15)  |
| N201–Ag2–N3   | 94.10(15)  |
| N202–Ag2–N3   | 104.51(15) |
| C1–N1–Ag1     | 130.4(4)   |
| C101–N101–Ag1 | 126.5(4)   |

|               |          |
|---------------|----------|
| C112–N101–Ag1 | 113.2(3) |
| C110–N102–Ag1 | 126.4(4) |
| C111–N102–Ag1 | 116.1(3) |
| C2–N2–Ag2     | 161.2(4) |
| C201–N201–Ag2 | 125.6(4) |
| C212–N201–Ag2 | 116.7(3) |
| C210–N202–Ag2 | 127.2(4) |
| C211–N202–Ag2 | 113.7(3) |
| C3–N3–Ag2     | 162.6(4) |

**Table S5.** Selected bond distances (Å) and angles (°) for **3**

| <b>3</b> |           |
|----------|-----------|
| Ag1–N1   | 2.330(5)  |
| Ag1–N3   | 2.206(5)  |
| Ag1–N11  | 2.462(5)  |
| Ag1–N12  | 2.493(6)  |
| Ag1–N3   | 2.206(5)  |
| Ag2–N3   | 1.994(5)  |
| Ag2–N1   | 2.426(6)  |
| Ag2–N12  | 2.240(6)  |
| Ag2–N3   | 1.994(5)  |
| Ag3–C2   | 2.491(5)  |
| Ag3–Se4  | 2.8665(7) |
| Ag3–Se3  | 3.0418(7) |
| Ag3–N1   | 2.309(5)  |
| Ag3–N21  | 2.387(5)  |
| Ag3–N22  | 2.583(5)  |
| Ag3–Se3  | 3.0418(7) |
| Ag3–Se4  | 2.8665(7) |
| Ag1–N1   | 2.330(5)  |
| Ag1–N3   | 2.206(5)  |

|             |           |
|-------------|-----------|
| Ag1–N11     | 2.462(5)  |
| Ag1–N12     | 2.493(6)  |
| Ag1–N3      | 2.206(5)  |
| Ag2–N3      | 1.994(5)  |
| Ag2–N1      | 2.426(6)  |
| Ag2–N12     | 2.240(6)  |
| Ag2–N3      | 1.994(5)  |
| Ag3–C2      | 2.491(5)  |
| Ag3–Se4     | 2.8665(7) |
| Ag3–Se3     | 3.0418(7) |
| Ag3–N1      | 2.309(5)  |
| Ag3–N21     | 2.387(5)  |
| Ag3–N22     | 2.583(5)  |
| Ag3–Se3     | 3.0418(7) |
| Ag3–Se4     | 2.8665(7) |
| Ag1–C3–N3   | 132.8(5)  |
| Ag2–C3–N3   | 138.6(6)  |
| Ag1–C3–N3   | 132.8(5)  |
| Ag2–C3–N3   | 138.6(6)  |
| Ag3–C13–N22 | 124.3(4)  |
| Ag3–C13–N22 | 124.3(4)  |
| Ag3–C12–N22 | 126.4(5)  |
| Ag3–C12–N22 | 126.4(5)  |
| Ag3–C15–N21 | 117.9(5)  |
| Ag3–C15–N21 | 117.9(5)  |
| Ag3–C14–N21 | 122.5(4)  |
| Ag3–C14–N21 | 122.5(4)  |
| Ag1–C13–N12 | 118.9(4)  |
| Ag2–C13–N12 | 126.6(5)  |
| Ag1–C13–N12 | 118.9(4)  |
| Ag2–C13–N12 | 126.6(5)  |
| Ag1–C10–N12 | 121.2(6)  |



|             |          |
|-------------|----------|
| Ag2–C10–N12 | 113.5(6) |
| Ag1–C10–N12 | 121.2(6) |
| Ag2–C10–N12 | 113.5(6) |
| Ag1–C17–N11 | 120.8(5) |
| Ag1–C17–N11 | 120.8(5) |
| Ag1–C14–N11 | 129.1(4) |
| Ag1–C14–N11 | 129.1(4) |
| Ag1–C1–N1   | 119.1(4) |
| Ag2–C1–N1   | 107.2(5) |
| Ag3–C1–N1   | 141.9(4) |
| Ag1–C1–N1   | 119.1(4) |
| Ag2–C1–N1   | 107.2(5) |
| Ag3–C1–N1   | 141.9(4) |
| Ag3–N2–C2   | 93.8(5)  |
| Ag3–N2–C2   | 93.8(5)  |

**Table S6.** Selected bond distances (Å) and angles (°) for **4**

| <b>4</b> |           |
|----------|-----------|
| Ag1–N11  | 2.233(3)  |
| Ag1–N11  | 2.233(3)  |
| Ag1–N1   | 2.473(5)  |
| Ag2–N2   | 2.140(3)  |
| Ag2–C1   | 2.503(5)  |
| Ag2–Se4  | 2.7831(8) |
| Ag2–C1   | 2.503(5)  |
| Ag2–N2   | 2.140(3)  |
| Ag2–Se4  | 2.7831(8) |
| Ag1–N11  | 2.233(3)  |
| Ag1–N11  | 2.233(3)  |
| Ag1–N1   | 2.473(5)  |
| Ag2–N2   | 2.140(3)  |

|             |            |
|-------------|------------|
| Ag2–C1      | 2.503(5)   |
| Ag2–Se4     | 2.7831(8)  |
| Ag2–C1      | 2.503(5)   |
| Ag2–N2      | 2.140(3)   |
| Ag2–Se4     | 2.7831(8)  |
| N11–Ag1–N1  | 92.81(9)   |
| N11–Ag1–N11 | 169.72(17) |
| N11–Ag1–N1  | 92.81(9)   |
| C1–Ag2–Se4  | 85.64(13)  |
| N2–Ag2–Se4  | 100.45(10) |
| N2–Ag2–N2   | 139.0(2)   |
| N2–Ag2–C1   | 108.22(10) |
| N2–Ag2–Se4  | 100.45(10) |
| N2–Ag2–C1   | 108.22(10) |
| N1–C1–Re1   | 174.5(5)   |
| N1–C1–Ag2   | 90.1(4)    |
| C1–N1–Ag1   | 166.0(5)   |
| C11–N11–Ag1 | 124.0(3)   |
| C15–N11–Ag1 | 119.8(3)   |
| C2–N2–Ag2   | 153.3(3)   |

**Table S7.** Selected bond distances (Å) and angles (°) for **5**

| 5       |           |
|---------|-----------|
| Ag2–Ag2 | 3.3745(9) |
| Ag2–N2  | 2.630(4)  |
| Ag2–N22 | 2.180(4)  |
| Ag2–N21 | 2.176(4)  |
| Ag1–N1  | 2.489(4)  |
| Ag1–N11 | 2.207(4)  |

|              |             |
|--------------|-------------|
| Ag1–Se1      | 3.0564(6)   |
| Ag1–N12      | 2.214(4)    |
| N2–Ag2–Ag2   | 126.58(10)  |
| N22–Ag2–Ag2  | 74.78(12)   |
| N22–Ag2–N2   | 90.73(14)   |
| N21–Ag2–Ag2  | 107.52(12)  |
| N21–Ag2–N2   | 88.91(14)   |
| N21–Ag2–N22  | 177.33(17)  |
| Re1–Se3–Re3  | 62.755(12)  |
| Re3–Se1–Ag1  | 137.596(19) |
| C101–N11–Ag1 | 126.8(3)    |
| C105–N11–Ag1 | 117.0(3)    |
| C120–N12–Ag1 | 126.6(3)    |
| C121–N12–Ag1 | 116.2(3)    |
| C2–N2–Ag2    | 108.1(4)    |
| C1–N1–Ag1    | 133.6(4)    |
| C221–N22–Ag2 | 121.4(3)    |
| C220–N22–Ag2 | 122.4(3)    |
| C201–N21–Ag2 | 123.6(3)    |
| C205–N21–Ag2 | 120.3(3)    |
| N11–Ag1–Se1  | 91.43(11)   |
| N11–Ag1–N12  | 172.51(15)  |
| N11–Ag1–N1   | 93.55(14)   |
| N12–Ag1–Se1  | 83.39(10)   |
| N12–Ag1–N1   | 92.19(14)   |
| N1–Ag1–Se1   | 172.23(10)  |

**Table S8.** Selected bond distances (Å) and angles (°) for **6**

|         |            |
|---------|------------|
|         |            |
| Ag1–Ag1 | 3.3360(14) |
| Ag1–N1  | 2.622(8)   |

|              |            |
|--------------|------------|
| Ag1–N11      | 2.164(7)   |
| Ag1–N12      | 2.165(7)   |
| Ag2–N2       | 2.552(8)   |
| Ag2–N21      | 2.193(7)   |
| Ag2–S3       | 3.061(2)   |
| Ag2–N22      | 2.183(7)   |
| N1–Ag1–Ag1   | 131.66(17) |
| N11–Ag1–Ag1  | 74.1(2)    |
| N11–Ag1–N1   | 90.6(3)    |
| N11–Ag1–N12  | 177.0(3)   |
| N12–Ag1–Ag1  | 108.3(2)   |
| N12–Ag1–N1   | 89.0(3)    |
| N21–Ag2–N2   | 93.1(3)    |
| N22–Ag2–N2   | 92.5(3)    |
| N22–Ag2–N21  | 174.3(3)   |
| C1–N1–Ag1    | 105.7(6)   |
| C101–N11–Ag1 | 121.8(6)   |
| C105–N11–Ag1 | 121.4(6)   |
| C120–N12–Ag1 | 120.3(6)   |
| C121–N12–Ag1 | 123.4(6)   |
| C2–N2–Ag2    | 131.7(7)   |
| C201–N21–Ag2 | 117.1(6)   |
